# Supplementary material for: The Functional Human C-Terminome
Source: PLoS One. 2016 Apr 6;11(4):e0152731. doi: 10.1371/journal.pone.0152731 (PMC4822787; doi:10.1371/journal.pone.0152731)
Supplement: S1 Methods — (DOCX) [file pone.0152731.s003.docx]

**S1 Methods. Method for generating *de novo* C-terminal sequence patterns.**

***Steps for generating sequences/patterns***

1. Get a list of protein sequences anchored at the c-termini between 3 and 10 amino acids in length
2. Generate terminal anchored combination supersets of the sequences generated in step 1
3. Eliminate supersets which do not occur more than once

***Step 1: Get a list of protein sequences anchored at the C-termini between 3 and 10 amino acids in length***

Let **Σ** represent the set of amino acids present in proteins of the human genome, then **Σ** can be expressed as:

**Σ = { A, R, N, D, C, E, Q, G, H, I, L, K, M, F, P, S, T, W, Y, V }**

A single element of the set **Σ** can be expressed as **σp** where **p** represents the amino acid position in **Σ**:

**{ σp ϵ Σ, 1 ≤ p ≤ 20)**

**example: σ19 = Y**

A single element or no element can be symbolized as follows:

**{ σpε | σpε ϵ (Σ U empty set), 0 ≤ p ≤ 20, 0 = empty state}**

**examples: σ3ε= N, σ0ε = { }**

Any generated sequence of length 3 to 10 amino acids can be represented as follows:

**ω = σaσbσcσdεσeεσfεσgεσhεσiεσjε**

**example: σ12σ4σ6σ11σ0εσ0εσ0εσ0εσ0εσ0ε = KDEL**

Let **Ρ** represent the set of proteins in the human genome, then **Ρi** represents a single protein where:

**{ Ρi ϵ Ρ | 1 ≤ Ρi ≤ ΡSIZE }**

A position specific amino acid in protein **Ρi** can be express as follows:

**Ρi, j = { σp | 1 ≤ j ≤ Ρi, LENGTH }**

**example: if Ρ1 = {…DMEETDD} then Ρ1, LENGTH-2 = T = σ17**

Let **Ψ** represent the set of C-termini sequences generated from **Ρ**, then **Ψi**  is of the form **ω** where:

**ΨSIZE = (ΡSIZE * 8)**

**{ Ψi ϵ Ψ** **| 1 ≤ Ψi ≤ ΨSIZE }**

Generation of the set **Ψ**:

**for each Ρi ϵ Ρ**

**j = Ρi, LENGTH – 9**

**while( j ≤ (Ρi, LENGTH – 2) ) do the following:**

**ω = Ρi, j + ... + Ρi, LENGTH-1 + Ρi, LENGTH**

**add ω to Ψ**

**j = j + 1**

**example:**

**Ρi** = {…GNMGPQYVTTYA}

**Ψ =** {MGPQYVTTYA, GPQYVTTYA, PQYVTTYA, QYVTTYA, YVTTYA, VTTYA, TTYA, TYA}

***Step 2: Generate terminal anchored combination supersets of the sequences generated in step 1***

A single degenerate position can be denoted by **Χ**, which represents all amino acids:

**Χ = { σp ϵ Σ }**

A single degenerate position or no element at that position can be denoted as **Χε**:

**Χε = { σp ϵ (Σ U empty set) }**

A sequence with at least one degenerate position whereby neither the first nor the last position can be degenerate can be expressed as follows:

**φ = { σa(σxε Χε)^*Χ (σxε Χε)^*σb | ^* symbolizes the shorthand expansion of (σxε Χε) }**

Let **Φ** represent the set of degenerate sequences derived from **Ψ**, then **Φi** is a degenerate sequence of the form φwhere:

**ΦSIZE =**

**{ Φi ϵ Φ** **| 1 ≤ Φi ≤ Φsize }**

Generation of the set **Φ**:

For each **Ψi**

j=1

while ( j < 2**Ψi, LENGTH-2**) do:

φ **= Ψi, 1**

mod_bin = j

k=2

while (k < **Ψi, LENGTH**) do:

if the remainder of mod_bin/2 is 1, do:

φ **=** φ **+ Χ**

otherwise:

φ **=** φ **+ Ψi, k**

mod_bin = mod_bin/2

k = k + 1

φ **=** φ **+ Ψi, LENGTH**

add φ **to Φ**

j = j + 1

***algorithm b.***

**example:**

**Ψ** = { MGPQYVTTYA, GPQYVTTYA, PQYVTTYA, QYVTTYA, YVTTYA, VTTYA, TTYA, TYA }

**Φ =** { MXPQYVTTYA , MGXQYVTTYA , MXXQYVTTYA , MGPXYVTTYA, …, TXYA, TTXA, TXXA, TXA}

***Step 3: Eliminate supersets which do not occur more than once***

Let **Ω** represent a set of all degenerate and non-degenerate sequences derived from **Ψ** and **Φ**, then **Ωi** is either of the form **ω** or **φ** where:

**{ Ωi ϵ Ω | 1 ≤ Ωi ≤ Ω SIZE }**

Generation of the set **Ω**:

for each **Ψj**:

add **Ψj** to **Ω**

for each **Φj**:

count = 0

for each **Ψk:**

if **Ψk**  matches **Φj** -> (note: all **Χ** in **Φj** can be substituted for any amino acid at the same position in **Ψk**)

count = count + 1

if count > 1

add **Φj** to **Ω**

***algorithm c.***

**example:**

**Ψ = {** …, TGYA, ATYA, TTTA, TTRA, … **}**

**Φ = {** …, TXYA, TTXA, TXXA, …}

**Ω = {** …, TGYA, ATYA, TTTA, TTRA, …, TTXA, TXXA, … }
