# Supplementary material for: The Functional Human C-Terminome
Source: PLoS One. 2016 Apr 6;11(4):e0152731. doi: 10.1371/journal.pone.0152731 (PMC4822787; doi:10.1371/journal.pone.0152731)
Supplement: S1 Table — (XLS) [file pone.0152731.s004.xls]

## Sheet: S1 Table
Supplementary Table 1: List of C-terminal minimotifs having multiple functions.
S.No.	Minimotif Sequence	Motif Type	Activity	Sub-activity	Pubmed ID / Reference	Occurrences
1	[KRHQSA][DENQ]EL>	Consensus	Bind, Traffic	Endoplasmic Reticulum	3545499	81
2	[SAC][KRM]L>	Consensus	Bind, Traffic	Peroxisomes	1567655	111
3	[STAGCN][KRH][LIVMAFY]>	Consensus	Bind, Traffic	Peroxisomes, Microbodies	2901422	839
4	[WFY]RP[WFY]x>	Consensus	Bind, Traffic	Endoplasmic Reticulum Export	12972562	17
5	[WFY]RP[WFY]xx>	Consensus	Bind, Traffic	Endoplasmic Reticulum Export	12972562	17
6	[WFY]RP[WFY]xxx>	Consensus	Bind, Traffic	Endoplasmic Reticulum Export	12972562	17
7	[WFY]RP[WFY]xxxx>	Consensus	Bind, Traffic	Endoplasmic Reticulum Export	12972562	17
8	[WFY]RP[WFY]xxxxx>	Consensus	Bind, Traffic	Endoplasmic Reticulum Export	12972562	17
9	[WFY]RP[WFY]xxxxxx>	Consensus	Bind, Traffic	Endoplasmic Reticulum Export	12972562	17
10	ARSRSISTDV>	Instance	Bind	PDZ	15164053, 10737800, 12477932	2
11	ARSRSISTDV>	Instance	Post-Translational Modification	Phosphorylation	http://www.uniprot.org/uniprot/P0C2L3	2
12	DLDEEEDTHL>	Instance	Bind	PDZ	24146797 , 24143384 , 23652315	2
13	DLDEEEDTHL>	Instance	Post-Translational Modification	Phosphorylation	http://www.uniprot.org/uniprot/O00592	2
14	DxE>	Consensus	Bind, Traffic	Endoplasmic Reticulum Export	11726510	132
15	EDQHTQITKV>	Instance	Bind	PDZ	24187456 ,24747746, 24596386, 24515759, 24284390	1
16	EDQHTQITKV>	Instance	Post-Translational Modification	Phosphorylation	10646847	1
17	EKLSSIESDV>	Instance	Bind	PDZ	23648631, 23238346	1
18	EKLSSIESDV>	Instance	Post-Translational Modification	Phosphorylation	15537897	1
19	FCYENEV>	Instance	Bind, Traffic	Endoplasmic Reticulum Export	11287009	0
20	FFxxKKxx>	Consensus	Bind, Traffic	Endoplasmic Reticulum Export	15125774	3
21	FxxxFxxxF>	Consensus	Bind, Traffic	Endoplasmic Reticulum Export	11331877	3
22	GDSSRKEYFI>	Instance	Bind	PDZ	24652986, 24379273 , 21061946	3
23	GDSSRKEYFI>	Instance	Post-Translational Modification	Phosphorylation	http://www.uniprot.org/uniprot/P04921	3
24	GGDDKKEYFI>	Instance	Bind	PDZ	24112238 , 21325282 , 20078932	2
25	GGDDKKEYFI>	Instance	Post-Translational Modification	Phosphorylation	http://www.uniprot.org/uniprot/Q1WIM3	2
26	HDEL>	Instance	Bind, Traffic	Endoplasmic Reticulum	2178921	14
27	KDEL>	Instance	Bind, Traffic	Endoplasmic Reticulum	3545499	14
28	KGSEKEEYFI>	Instance	Bind	PDZ	15986429, 15021913, 23000965, 22505724, 21987572, 21963094, 21906983, 18029348, 14702039, 12477932	2
29	KGSEKEEYFI>	Instance	Post-Translational Modification	Phosphorylation	http://www.uniprot.org/uniprot/Q0VAQ4	2
30	KKMPSIESDV>	Instance	Bind	PDZ	23940648,23933819,23933818, 21883175	2
31	KKMPSIESDV>	Instance	Post-Translational Modification	Phosphorylation	17179037	2
32	KKNKDKEYYV>	Instance	Bind	PDZ	24064682, 23772147	6
33	KKNKDKEYYV>	Instance	Post-Translational Modification	Phosphorylation	http://www.uniprot.org/uniprot/Q9P2S2	6
34	KKx>	Consensus	Bind, Traffic	Endoplasmic Reticulum	2120038	296
35	KKxx>	Consensus	Bind, Traffic	Endoplasmic Reticulum	2527615	294
36	KxKxx>	Consensus	Bind, Traffic	Endoplasmic Reticulum	2120038, 10864930	641
37	NLSIEKETKL>	Instance	Bind	PDZ	16534843 , 22797925 , 24250222	1
38	NLSIEKETKL>	Instance	Post-Translational Modification	Phosphorylation	http://www.uniprot.org/uniprot/Q9NWL6	1
39	NSEEKKEYFI>	Instance	Bind	PDZ	24465823 , 24092566 , 23907434	2
40	NSEEKKEYFI>	Instance	Post-Translational Modification	Phosphorylation	http://www.uniprot.org/uniprot/Q9BY67	2
41	QYPGSPDSWV>	Instance	Bind	PDZ	23640939 , 19830446 , 19005682	2
42	QYPGSPDSWV>	Instance	Post-Translational Modification	Phosphorylation	http://www.uniprot.org/uniprot/Q68FH0	2
43	SKL>	Instance	Bind, Traffic	Peroxisomes, Microbodies	1567655	34
44	VxPx>	Consensus	Bind, Traffic	Rod outer segment	15728366	102
45	VxxSL>	Consensus	Bind, Traffic	Cell surface	11343973	11
46	Yxx[FWY]>	Consensus	Bind, Traffic	Dendrites	15689548	107
47	Yxx[FY]>	Consensus	Bind, Traffic	Internalizaiton	9175836	98
